# Supplementary material
Source: PubMed Central journal article supplement (PMC2872446)
Supplement: 1000357107_pnas.201000357SI.pdf [file 1000357107_pnas.201000357SI.pdf]

# Supporting Information

Yang et al. 10.1073/pnas.1000357107

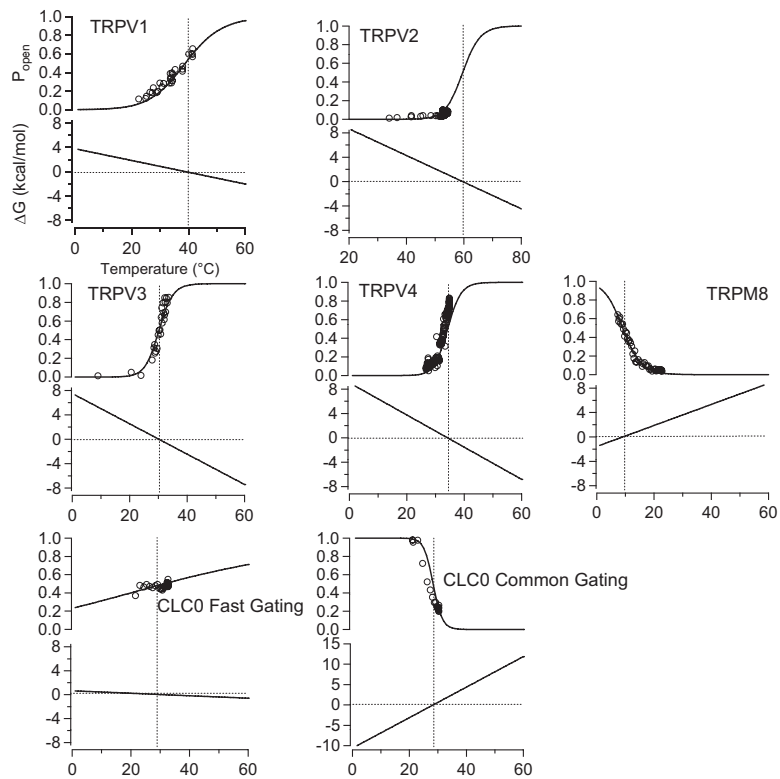

**Fig. S1.** The channel open probability and free energy associated with temperature-sensitive activation for each thermoTRP channel type and CLC-0. Raw data points represent channel open probabilities recorded from inside-out patches. Superimposed are  $P_{open}$ -Temperature curves calculated from thermodynamic measurements of  $\Delta H$  and  $\Delta S$ . Vertical dotted lines indicate  $T_{0.5}$ .





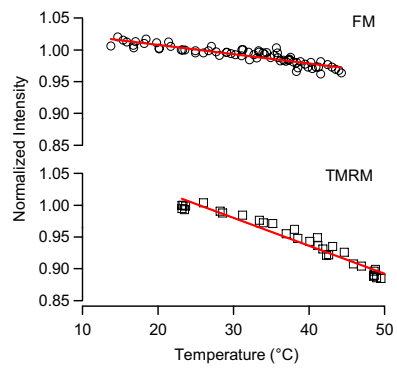

**Fig. S6.** Temperature dependence of fluorescence emission by FM and TMRM. Red lines represent linear fits. The slope factors for FM and TMRM are  $-0.00146/\text{degree}$  and  $-0.00439/\text{degree}$ , respectively.
